# Supplementary material for: Population Pharmacokinetics of Cotadutide in Subjects with Type 2 Diabetes
Source: Springer Nature journal article supplement (doi:10.1007/s40262-021-01094-y), 2022-03-02
Supplement: 40262_2021_1094_MOESM1_ESM.docx [file 40262_2021_1094_MOESM1_ESM.docx]

**Supplementary Fig. 1 Flow chart of population PK model development**

Develop the initial population PK model using pooled PK data from five studies with intensive PK sampling (n=172). Estimate typical values and IIV of CL/F, Vc/F, Ka. Body weight and sex effect on CL/F, Vc/F, and Ka were evaluated. A statistically significant effect of weight and sex on Vc/F, and body weight on CL/F was identified. No significant covariate was identified on ka.

Develop the final population PK model using trough PK data from a phase 2b study D5670C00004 (n=587).

The PK parameters Vc/F, ka, and the weight effect on Vc/F, and sex effect on Vc/F could not be well estimated since only trough concentrations were available. Therefore, these PK parameters, associated covariates and unexplained IIV, were fixed to the estimations from the initial population PK model that was developed based on intense PK data. CL/F, associated covariate effect and IIV were further evaluated in final model.

Multiple covariate effects were tested on CL/F through SCM (baseline ALB, HbA1c, ALT, AST, alkaline phosphatase, total bilirubin, BMI, age, eGFR, sex, duration of diabetes, and ethnicity).

*ALB* albumin, *ALT* alanine aminotransferase, *AST*, aspartate aminotransferase, *BMI* body mass index, *CL/F* apparent clearance, *eGFR* estimated glomerular filtration rate, *HbA1c* hemoglobin A1c, *ka* first‐order absorption rate constant, *PK* pharmacokinetic, *SCM* stepwise covariate modeling, *Vc/F* apparent volume of distribution of the central compartment.
